# Supplementary material for: Designing 3D Oxygen–Diffusion Scaffolds for High-performance Metal Fuels
Source: Research Square preprint supplement (doi:10.21203/rs.3.rs-7748008/v1), 2026-02-24
Supplement: Supplementary file 1 [file 922132c28fea475f5562d063.docx]

**Supporting Information**

**Designing** **3D Oxygen**–**Diffusion** **Scaffolds for High-performance Metal Fuels**

*Shan Feng1,2#, Hexige Wuliji1,3#*, Ruifeng Liu1, Xinba Yaer1, Xiaoping Niu2,* *Jun Wang4, Kunpeng Zhao5* and Hexi Baoyin6,7**

1 Inner Mongolia Engineering Research Center of Multi-functional Copper Alloys, School of Materials Science and Engineering, Inner Mongolia University of Technology, Hohhot, 010051, China.

2 China North Nuclear Fuel Co., Ltd., Baotou, 014035, China.

3 Key Laboratory of Advanced Optoelectronic Quantum Architecture and Measurement, Ministry of Education, School of Physics, Beijing Institute of Technology, Beijing 100081, China.

4 Inner Mongolia Key Laboratory of Biophysics and Bioinformatics, School of Physical Science and Technology, Inner Mongolia University, Hohhot, 010021, China.

5 State Key Laboratory of Metal Matrix Composites, School of Materials Science and Engineering, Shanghai Jiao Tong University, Shanghai, 200240, China.

6 Inner Mongolia Key Laboratory of New Energy and Energy Storage Technology, Inner Mongolia University of Technology, Hohhot, 010051, China.

7 School of Aerospace Engineering, Tsinghua University, Beijing, 100084, China.

* Corresponding authors: [wljhxg@imut.edu.cn](mailto:wljhxg@imut.edu.cn); [zkp.1989@sjtu.edu.cn](mailto:zkp.1989@sjtu.edu.cn) and [baoyin@tsinghua.edu.cn](mailto:baoyin@tsinghua.edu.cn).

# These authors contributed equally: Shan Feng and Hexige Wuliji.


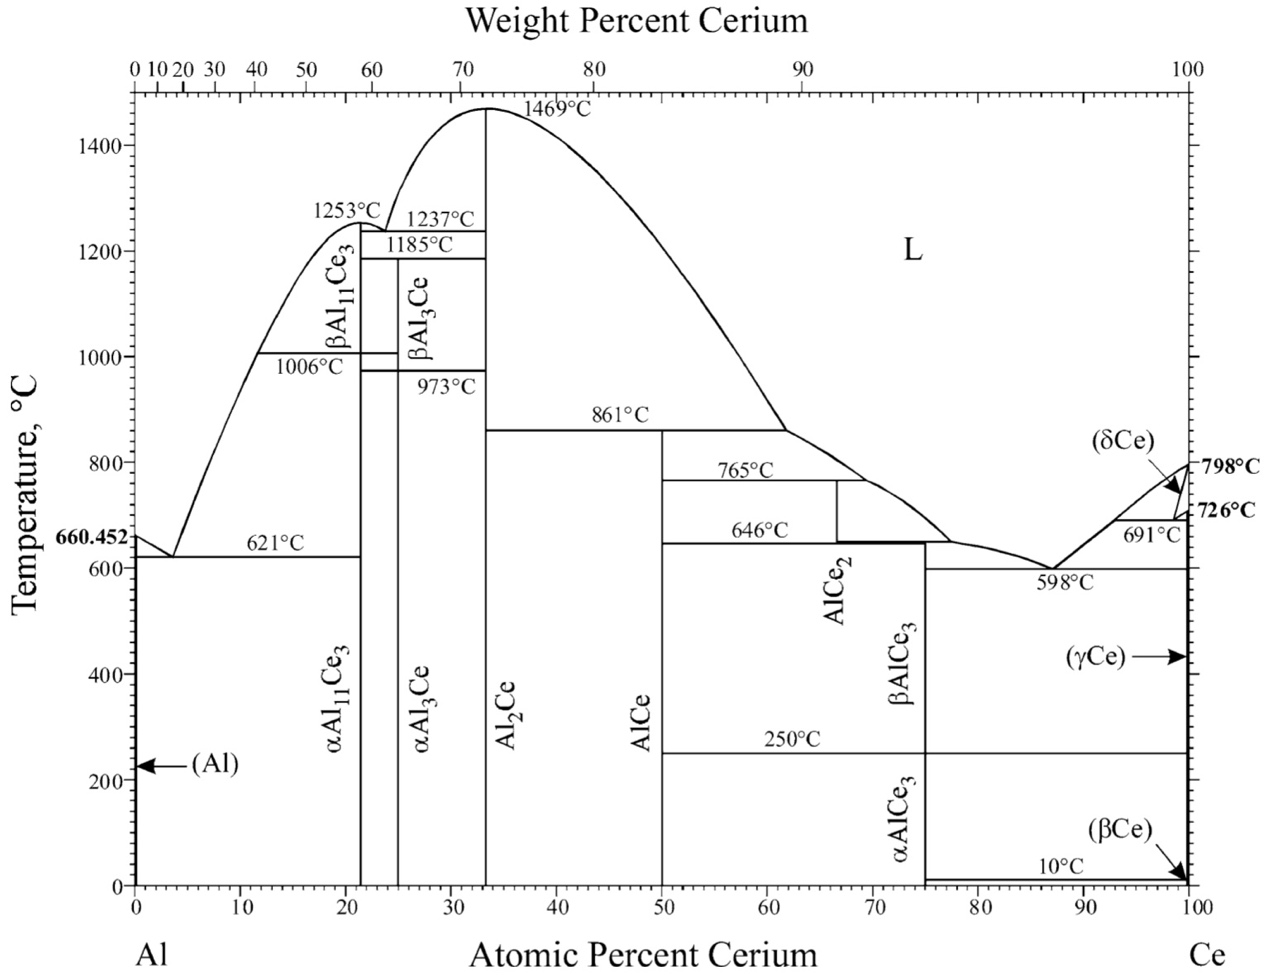


Fig. S1. Al-Ce binary phase diagram1.


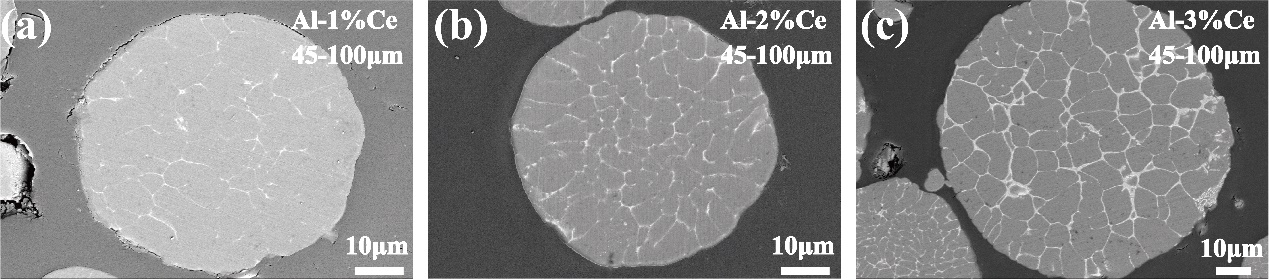


Fig. S2. SEM images of Al–xCe (x = 1, 2, 3 wt.%) alloy powders with 45-100μm particle size. (a) Al-1%Ce, (b) Al-2%Ce , (c) Al-3%Ce.


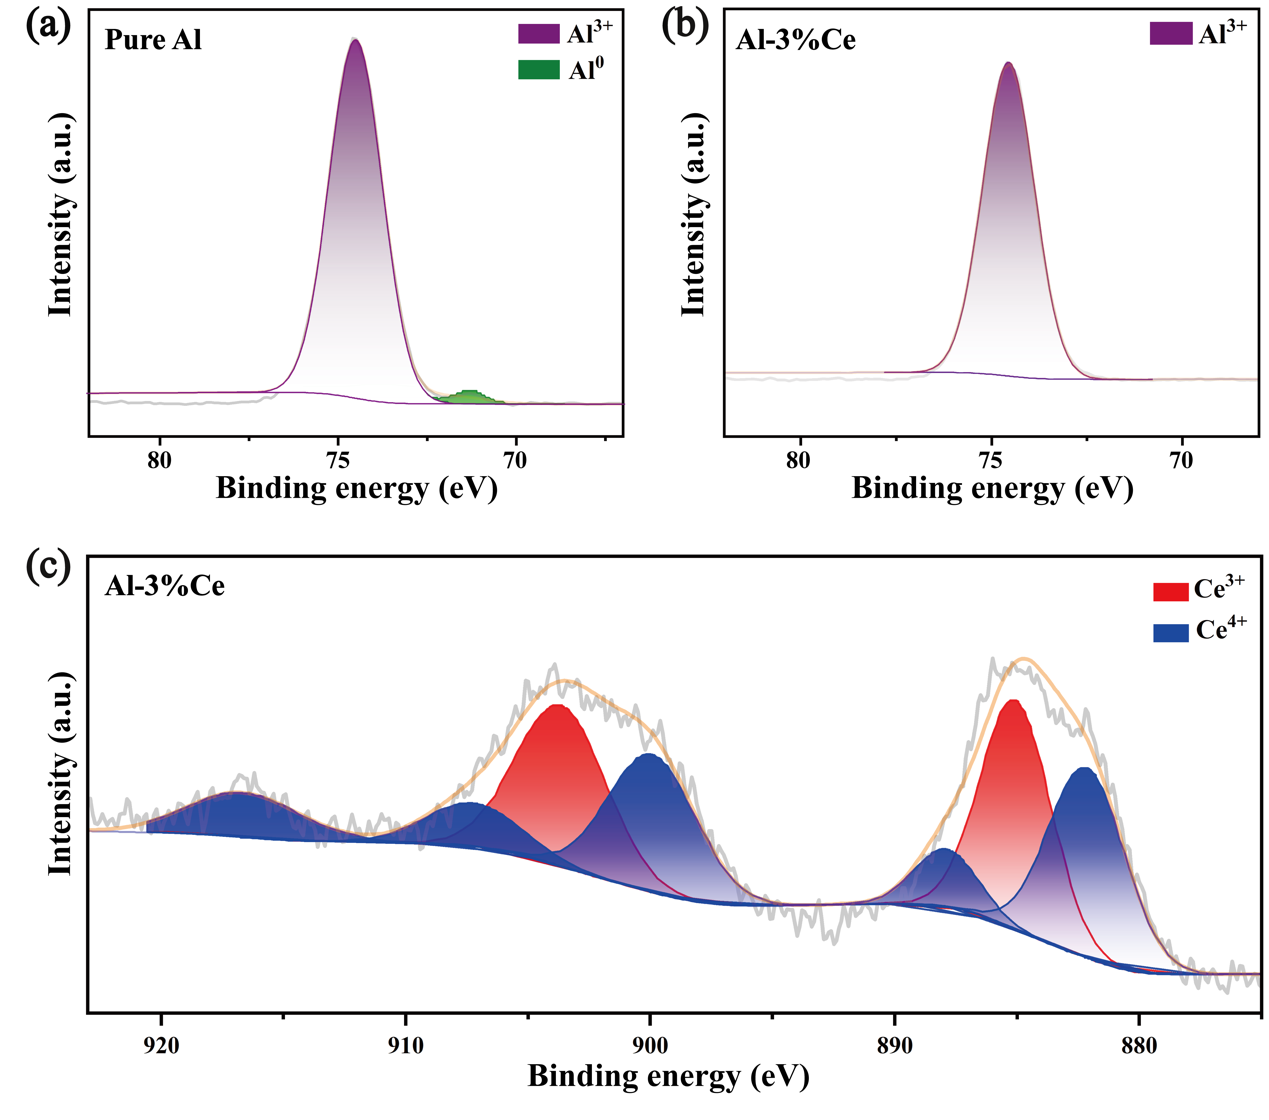


Fig. S3. XPS spectrum of (a) Al3+ and Al in the combustion products of pure Al powder, (b) Al–3%Ce alloy powders, and (c) Ce3+/Ce4+ of Al–3%Ce alloy powders.


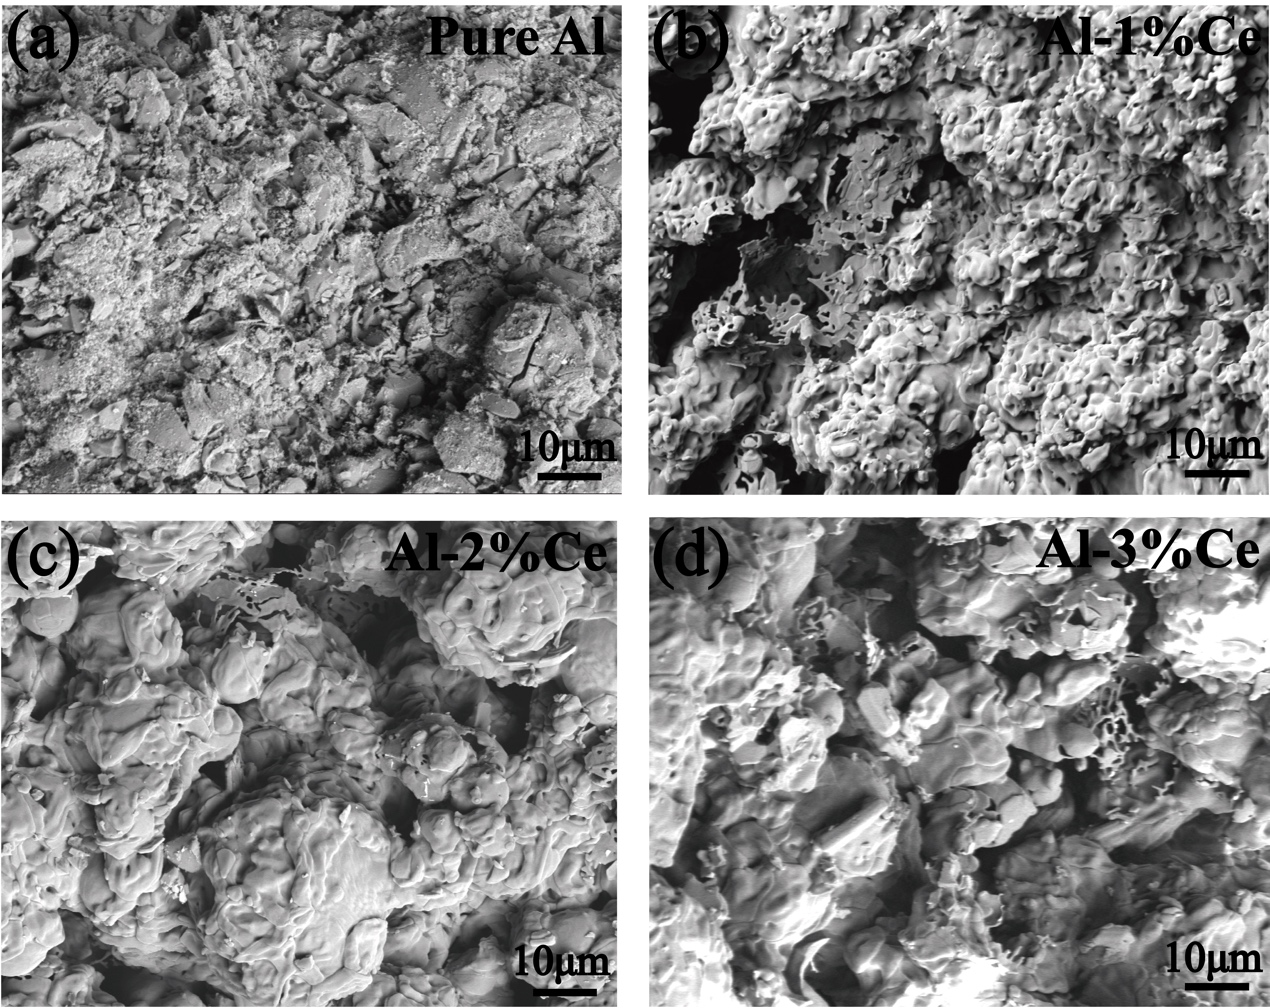


Fig. S4. SEM images of combustion products for (a) Pure Al, (b) Al-1%Ce, (c) Al-2%Ce, and (d) Al-3%Ce Powder.


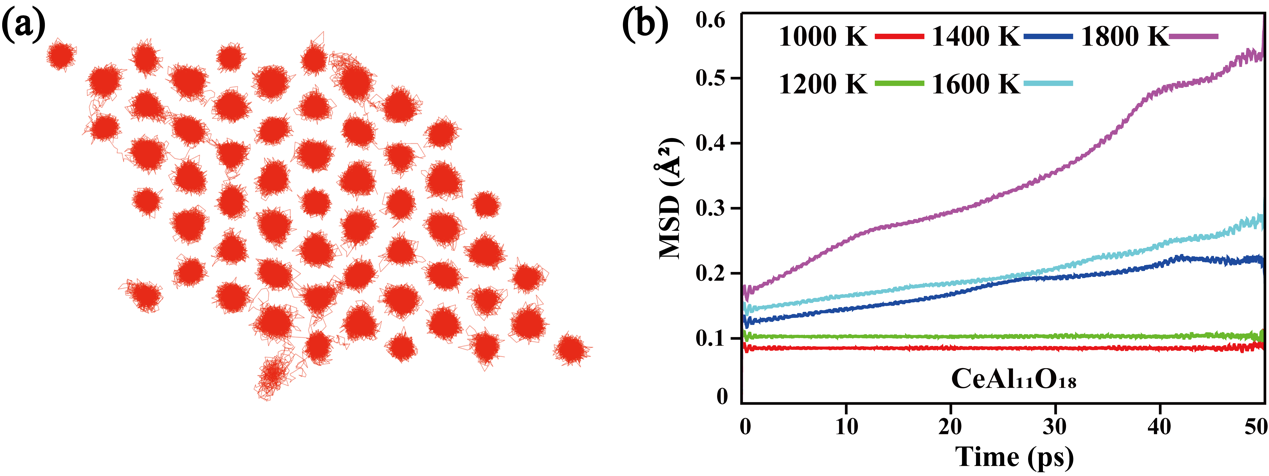


Fig. S5. (a) Oxygen atom trajectories and (b) mean square displacement (MSD) of O atom in CeAl11O18.

References

1. Okamoto, H. Al-Ce (Aluminum-Cerium). *J. Phase Equilibria Diffus.* **32**, 392–393 (2011).
